# Supplementary material for: HIV persists in late coronary atheroma and is associated with increased local inflammation and disease progression
Source: Research Square preprint supplement (doi:10.21203/rs.3.rs-5125826/v1), 2024-10-18
Supplement: Supplementary file 1 [file 172bdf5ac5eb63ce01e20c97.xlsx]

## Sheet: Supplemental Table 5
Supplemental Table 5: ICD-code based HIV case-control definitions in the BioVU cohort
	HIV Case Inclusion Codes
	Code	Code Type	Description
	042	ICD9CM	Human immunodeficiency virus [HIV] disease
	042.0	ICD9CM	HIV infection with certain specified infections
	042.1	ICD9CM	HIV infection causing other specified infections
	042.2	ICD9CM	HIV infection with specified malignant neoplasms
	043	ICD9CM	HIV causing other specified conditions
	043.0	ICD9CM	HIV causing lymphadenopathy
	043.1	ICD9CM	HIV causing specified diseases of the central nervous system
	043.2	ICD9CM	HIV causing other disorders involving the immune mechanism
	043.3	ICD9CM	HIV causing other specified conditions
	044	ICD9CM	Other human immunodeficiency virus [HIV] infection
	044.0	ICD9CM	HIV infection causing specified acute infections
	044.9	ICD9CM	HIV infection not otherwise specified (with or without other conditions not classifiable to 042, 043, 044.0)
	079.53	ICD9CM	Human immunodeficiency virus, type 2 [HIV-2] infection in conditions classified elsewhere and of unspecified site
	795.71	ICD9CM	Nonspecific serologic evidence of human immunodeficiency virus [HIV]
	V08	ICD10CM	Asymptomatic human immunodeficiency virus [HIV] infection status
	B20	ICD10CM	Human immunodeficiency virus [HIV] disease
	B97.35	ICD10CM	Human immunodeficiency virus, type 2 [HIV 2] as the cause of diseases classified elsewhere
	O98.7	ICD10CM	Human immunodeficiency virus [HIV] disease complicating pregnancy, childbirth and the puerperium, O98.71: Human immunodeficiency virus [HIV] disease complicating pregnancy
	O98.711	ICD10CM	Human immunodeficiency virus [HIV] disease complicating pregnancy, first trimester
	O98.712	ICD10CM	Human immunodeficiency virus [HIV] disease complicating pregnancy, second trimester
	O98.713	ICD10CM	Human immunodeficiency virus [HIV] disease complicating pregnancy, third trimester
	O98.719	ICD10CM	Human immunodeficiency virus [HIV] disease complicating pregnancy, unspecified trimester
	O98.72	ICD10CM	Human immunodeficiency virus [HIV] disease complicating childbirth
	O98.73	ICD10CM	Human immunodeficiency virus [HIV] disease complicating the puerperium
	Z21	ICD10CM	Asymptomatic human immunodeficiency virus [HIV] infection status)
	HIV Case Exclusion Codes
	Code	Code Type	Description
	R75	ICD10CM	Inconclusive laboratory evidence of human immunodeficiency virus [HIV]
	Z11.4	ICD10CM	Encounter for screening for human immunodeficiency virus [HIV]
	Z20.6	ICD10CM	Contact with and (suspected) exposure to human immunodeficiency virus [HIV]
	Z71.7	ICD10CM	Human immunodeficiency virus [HIV] counseling
	Z83.0	ICD10CM	Family history of human immunodeficiency virus [HIV] disease

## Sheet: Table S6
Supplemental Table 6: Genetically Regulated Gene Expression (GREX) Models of Inflammatory Genes: ABCA1, CD163, CXCL12
	Gene GREX	Contributing SNP	Weight	ref_allele	eff_allele	Tissue	Model performance R2	Best Performing Model
	ABCA1	rs3780546	0.133817	G	T	Adrenal Gland	0.115301	PrediXcan
	ABCA1	rs57989482	0.143062	C	T	Adrenal Gland	0.115301	PrediXcan
	ABCA1	rs1929841	0.0589956	A	C	Adrenal Gland	0.115301	PrediXcan
	ABCA1	rs72732702	0.0510042	G	A	Adrenal Gland	0.115301	PrediXcan
	ABCA1	rs328875	-0.00349587	C	T	Adrenal Gland	0.115301	PrediXcan
	ABCA1	rs451249	0.0602593	A	C	Adrenal Gland	0.115301	PrediXcan
	ABCA1	rs446303	0.141812	G	A	Adrenal Gland	0.115301	PrediXcan
	ABCA1	rs1809921	-0.0595023	A	G	Adrenal Gland	0.115301	PrediXcan
	ABCA1	rs872628	0.0160908	G	A	Adrenal Gland	0.115301	PrediXcan
	ABCA1	rs7039564	-0.0452752	T	C	Adrenal Gland	0.115301	PrediXcan
	ABCA1	rs186164465	-0.0798632	T	G	Artery Aorta	0.0199195	JTI
	ABCA1	rs12379205	0.0216061	C	T	Artery Aorta	0.0199195	JTI
	ABCA1	rs11789818	-0.0541098	C	T	Artery Tibial	0.0349212	JTI
	ABCA1	rs2297406	0.019514	C	T	Artery Tibial	0.0349212	JTI
	ABCA1	rs2777801	-0.0261672	A	C	Artery Tibial	0.0349212	JTI
	ABCA1	rs3818688	0.0897087	G	A	Artery Tibial	0.0349212	JTI
	ABCA1	rs2297400	0.0322915	T	C	Artery Tibial	0.0349212	JTI
	ABCA1	rs6479282	0.03774	T	C	Artery Tibial	0.0349212	JTI
	ABCA1	rs12002265	-0.0145049	T	C	Artery Tibial	0.0349212	JTI
	ABCA1	rs72732694	0.0694883	C	A	Artery Tibial	0.0349212	JTI
	ABCA1	rs1929841	-0.0190447	A	C	Artery Tibial	0.0349212	JTI
	ABCA1	rs2275542	0.0480376	C	T	Artery Tibial	0.0349212	JTI
	ABCA1	rs4743768	0.0654064	G	A	Artery Tibial	0.0349212	JTI
	ABCA1	rs2164560	-0.0388692	T	C	Artery Tibial	0.0349212	JTI
	ABCA1	rs12342875	-0.19202	T	C	Artery Tibial	0.0349212	JTI
	ABCA1	rs1039406	-0.0817748	T	C	Artery Tibial	0.0349212	JTI
	ABCA1	rs36053497	-0.197115	C	T	Breast Mammary Tissue	0.0150775	PrediXcan
	ABCA1	rs76996768	0.0142142	T	C	Breast Mammary Tissue	0.0150775	PrediXcan
	ABCA1	rs75206748	0.195319	T	G	Breast Mammary Tissue	0.0150775	PrediXcan
	ABCA1	rs117951521	0.0994208	A	G	Breast Mammary Tissue	0.0150775	PrediXcan
	ABCA1	rs34261668	0.0530452	C	T	Cells Cultured Fibroblasts	0.0453322	PrediXcan
	ABCA1	rs62568152	0.0769958	T	C	Cells Cultured Fibroblasts	0.0453322	PrediXcan
	ABCA1	rs12000861	-0.0311602	T	G	Cells Cultured Fibroblasts	0.0453322	PrediXcan
	ABCA1	rs2114012	0.0032997	G	A	Cells Cultured Fibroblasts	0.0453322	PrediXcan
	ABCA1	rs10761070	0.0123916	A	C	Cells Cultured Fibroblasts	0.0453322	PrediXcan
	ABCA1	rs10820724	0.0387722	T	C	Cells Cultured Fibroblasts	0.0453322	PrediXcan
	ABCA1	rs4149338	0.0372865	G	A	Cells Cultured Fibroblasts	0.0453322	PrediXcan
	ABCA1	rs2066716	0.0494525	C	T	Cells Cultured Fibroblasts	0.0453322	PrediXcan
	ABCA1	rs2777805	-0.0195609	A	G	Cells Cultured Fibroblasts	0.0453322	PrediXcan
	ABCA1	rs10820737	0.0555584	G	T	Cells Cultured Fibroblasts	0.0453322	PrediXcan
	ABCA1	rs2230805	0.0203593	C	T	Cells Cultured Fibroblasts	0.0453322	PrediXcan
	ABCA1	rs7044657	0.00745891	G	A	Cells Cultured Fibroblasts	0.0453322	PrediXcan
	ABCA1	rs4743787	0.0492671	A	G	Cells Cultured Fibroblasts	0.0453322	PrediXcan
	ABCA1	rs7023868	0.0082611	C	T	Cells Cultured Fibroblasts	0.0453322	PrediXcan
	ABCA1	rs429389	0.0107566	A	C	Cells Cultured Fibroblasts	0.0453322	PrediXcan
	ABCA1	rs3005723	0.0255086	C	T	Cells Cultured Fibroblasts	0.0453322	PrediXcan
	ABCA1	rs2047703	-0.0375584	G	A	Cells Cultured Fibroblasts	0.0453322	PrediXcan
	ABCA1	rs75201658	-0.0166614	T	G	Cells Cultured Fibroblasts	0.0453322	PrediXcan
	ABCA1	rs41277793	-0.00972907	A	G	Cells Cultured Fibroblasts	0.0453322	PrediXcan
	ABCA1	rs2417662	0.0157019	G	A	Cells Cultured Fibroblasts	0.0453322	PrediXcan
	ABCA1	rs10820554	-0.0405428	G	A	Esophagus Mucosa	0.0167924	JTI
	ABCA1	rs2777801	0.0778084	A	C	Esophagus Mucosa	0.0167924	JTI
	ABCA1	rs7850780	-0.074921	T	C	Esophagus Mucosa	0.0167924	JTI
	ABCA1	rs62568024	-0.0250918	T	C	Esophagus Mucosa	0.0167924	JTI
	ABCA1	rs1979019	-0.034708	G	T	Esophagus Mucosa	0.0167924	JTI
	ABCA1	rs62575079	0.0115135	G	A	Esophagus Mucosa	0.0167924	JTI
	ABCA1	rs41296093	0.100806	G	A	Esophagus Mucosa	0.0167924	JTI
	ABCA1	rs2777805	0.00066125	A	G	Esophagus Muscularis	0.0176711	JTI
	ABCA1	rs3818688	0.0401305	G	A	Esophagus Muscularis	0.0176711	JTI
	ABCA1	rs2297400	0.0109722	T	C	Esophagus Muscularis	0.0176711	JTI
	ABCA1	rs2472382	0.0292693	T	G	Esophagus Muscularis	0.0176711	JTI
	ABCA1	rs2487059	0.0368487	T	G	Esophagus Muscularis	0.0176711	JTI
	ABCA1	rs34136391	-0.00582132	C	T	Esophagus Muscularis	0.0176711	JTI
	ABCA1	rs75900485	0.0166141	A	G	Esophagus Muscularis	0.0176711	JTI
	ABCA1	rs2297400	0.0152967	T	C	Heart Left Ventricle	0.0200413	JTI
	ABCA1	rs2487059	0.0287545	T	G	Heart Left Ventricle	0.0200413	JTI
	ABCA1	rs17803787	0.0162088	A	G	Liver	0.0294997	PrediXcan
	ABCA1	rs10990998	-0.0369309	T	C	Liver	0.0294997	PrediXcan
	ABCA1	rs2122581	-0.00948831	A	G	Liver	0.0294997	PrediXcan
	ABCA1	rs10521067	-0.00486533	A	G	Liver	0.0294997	PrediXcan
	ABCA1	rs10820732	0.021715	A	G	Liver	0.0294997	PrediXcan
	ABCA1	rs10820733	0.0480537	G	A	Liver	0.0294997	PrediXcan
	ABCA1	rs2740479	0.0470878	A	G	Liver	0.0294997	PrediXcan
	ABCA1	rs3818688	0.0444797	G	A	Liver	0.0294997	PrediXcan
	ABCA1	rs2482418	0.0355086	A	G	Liver	0.0294997	PrediXcan
	ABCA1	rs2297400	0.0286951	T	C	Liver	0.0294997	PrediXcan
	ABCA1	rs2275545	-0.0363861	A	G	Liver	0.0294997	PrediXcan
	ABCA1	rs13284054	-0.108932	T	C	Liver	0.0294997	PrediXcan
	ABCA1	rs4100654	-0.121917	T	C	Liver	0.0294997	PrediXcan
	ABCA1	rs115555026	-0.0242529	C	T	Liver	0.0294997	PrediXcan
	ABCA1	rs2018930	-0.0122261	C	T	Liver	0.0294997	PrediXcan
	ABCA1	rs1501460	-0.0436371	T	C	Liver	0.0294997	PrediXcan
	ABCA1	rs10820772	0.031853	G	A	Liver	0.0294997	PrediXcan
	ABCA1	rs77170220	0.0197734	C	T	Liver	0.0294997	PrediXcan
	ABCA1	rs3124018	-0.0652166	A	G	Liver	0.0294997	PrediXcan
	ABCA1	rs3005740	-0.0935979	T	C	Liver	0.0294997	PrediXcan
	ABCA1	rs75206748	-0.011366	T	G	Liver	0.0294997	PrediXcan
	ABCA1	rs185194466	0.090898	C	T	Liver	0.0294997	PrediXcan
	ABCA1	rs73514074	0.124578	A	G	Liver	0.0294997	PrediXcan
	ABCA1	rs573202	-0.0549336	T	G	Liver	0.0294997	PrediXcan
	ABCA1	rs10816303	-0.000461981	A	G	Liver	0.0294997	PrediXcan
	ABCA1	rs4743757	0.0111715	A	G	Muscle Skeletal	0.0273031	JTI
	ABCA1	rs72548378	0.0776257	AATC	A	Muscle Skeletal	0.0273031	JTI
	ABCA1	rs2297405	0.0470444	A	C	Muscle Skeletal	0.0273031	JTI
	ABCA1	rs3780541	0.0728435	A	C	Muscle Skeletal	0.0273031	JTI
	ABCA1	rs13291863	-0.0818814	G	A	Muscle Skeletal	0.0273031	JTI
	ABCA1	rs4742924	0.112704	A	G	Muscle Skeletal	0.0273031	JTI
	ABCA1	rs1175293	-0.0634264	T	C	Muscle Skeletal	0.0273031	JTI
	ABCA1	rs2487060	0.012838	T	C	Muscle Skeletal	0.0273031	JTI
	ABCA1	rs11790326	0.0101265	T	C	Muscle Skeletal	0.0273031	JTI
	ABCA1	rs2740488	0.0189962	A	C	Muscle Skeletal	0.0273031	JTI
	ABCA1	rs1883025	0.0117336	C	T	Muscle Skeletal	0.0273031	JTI
	ABCA1	rs2575876	0.00365739	G	A	Muscle Skeletal	0.0273031	JTI
	ABCA1	rs10820743	-0.0169055	T	C	Muscle Skeletal	0.0273031	JTI
	ABCA1	rs2777795	0.30715	G	A	Muscle Skeletal	0.0273031	JTI
	ABCA1	rs186164465	0.0205755	T	G	Muscle Skeletal	0.0273031	JTI
	ABCA1	rs2515618	-0.0260007	C	T	Muscle Skeletal	0.0273031	JTI
	ABCA1	rs7857983	0.0672055	A	C	Muscle Skeletal	0.0273031	JTI
	ABCA1	rs60295489	-0.0104533	T	C	Muscle Skeletal	0.0273031	JTI
	ABCA1	rs2487053	-0.0385698	C	T	Muscle Skeletal	0.0273031	JTI
	ABCA1	rs4743766	0.0350496	T	C	Muscle Skeletal	0.0273031	JTI
	ABCA1	rs2027399	-0.0610747	G	A	Muscle Skeletal	0.0273031	JTI
	ABCA1	rs75900485	0.0696188	A	G	Muscle Skeletal	0.0273031	JTI
	ABCA1	rs10991473	0.0738463	G	A	Muscle Skeletal	0.0273031	JTI
	ABCA1	rs328875	-0.012844	C	T	Muscle Skeletal	0.0273031	JTI
	ABCA1	rs2297400	0.0270224	T	C	Skin Sun Exposed Lower leg	0.0181233	JTI
	ABCA1	rs2487059	0.0431109	T	G	Skin Sun Exposed Lower leg	0.0181233	JTI
	CD163	rs12816349	-0.00848821	G	A	Adrenal Gland	0.0436641	PrediXcan
	CD163	rs11524030	-0.0203059	C	T	Adrenal Gland	0.0436641	PrediXcan
	CD163	rs4764614	-0.0166666	C	T	Adrenal Gland	0.0436641	PrediXcan
	CD163	rs11064356	-0.0380674	C	T	Adrenal Gland	0.0436641	PrediXcan
	CD163	rs2286729	-0.103843	G	A	Adrenal Gland	0.0436641	PrediXcan
	CD163	rs10744717	0.0495907	C	T	Adrenal Gland	0.0436641	PrediXcan
	CD163	rs3742088	0.1167	A	C	Adrenal Gland	0.0436641	PrediXcan
	CD163	rs11612161	-0.0751935	A	G	Adrenal Gland	0.0436641	PrediXcan
	CD163	rs7296261	-0.0456483	A	G	Adrenal Gland	0.0436641	PrediXcan
	CD163	rs3742086	0.0364626	C	T	Adrenal Gland	0.0436641	PrediXcan
	CD163	rs10770616	-0.0096629	G	A	Adrenal Gland	0.0436641	PrediXcan
	CD163	rs1129728	0.0118971	T	C	Adrenal Gland	0.0436641	PrediXcan
	CD163	rs10845007	-0.112491	T	C	Adrenal Gland	0.0436641	PrediXcan
	CD163	rs7488360	-0.0233457	T	C	Adrenal Gland	0.0436641	PrediXcan
	CD163	rs12307997	0.0692838	A	G	Adrenal Gland	0.0436641	PrediXcan
	CD163	rs76067932	-0.0257931	A	G	Adrenal Gland	0.0436641	PrediXcan
	CD163	rs10772679	-0.0724744	T	G	Adrenal Gland	0.0436641	PrediXcan
	CD163	rs12310010	0.0316829	G	A	Adrenal Gland	0.0436641	PrediXcan
	CD163	rs12818448	0.198367	G	A	Adrenal Gland	0.0436641	PrediXcan
	CD163	rs11055677	-0.0483265	A	G	Adrenal Gland	0.0436641	PrediXcan
	CD163	rs17728008	0.00440103	T	C	Adrenal Gland	0.0436641	PrediXcan
	CD163	rs7305822	0.0153897	G	A	Adrenal Gland	0.0436641	PrediXcan
	CD163	rs887740	-0.116899	T	C	Adrenal Gland	0.0436641	PrediXcan
	CD163	rs6488801	-0.00733428	T	G	Adrenal Gland	0.0436641	PrediXcan
	CD163	rs11043661	-0.0889504	A	G	Adrenal Gland	0.0436641	PrediXcan
	CD163	rs2968743	0.0190663	G	A	Adrenal Gland	0.0436641	PrediXcan
	CD163	rs2953204	0.0148496	C	T	Adrenal Gland	0.0436641	PrediXcan
	CD163	rs139638620	-0.0150525	G	A	Artery Aorta	0.0169467	JTI
	CD163	rs79894691	-0.0716612	G	A	Artery Aorta	0.0169467	JTI
	CD163	rs12302881	-0.017757	A	G	Artery Aorta	0.0169467	JTI
	CD163	rs35480970	0.119068	A	G	Cells Cultured Fibroblasts	0.020496	JTI
	CD163	rs7484514	0.0291306	A	G	Cells Cultured Fibroblasts	0.020496	JTI
	CD163	rs7486933	0.0821271	A	G	Cells Cultured Fibroblasts	0.020496	JTI
	CD163	rs7956873	0.0427951	T	G	Cells Cultured Fibroblasts	0.020496	JTI
	CD163	rs79894691	-0.0549887	G	A	Cells Cultured Fibroblasts	0.020496	JTI
	CD163	rs11054130	-0.190473	T	C	Cells Cultured Fibroblasts	0.020496	JTI
	CD163	rs7487755	-0.0146854	C	A	Cells Cultured Fibroblasts	0.020496	JTI
	CD163	rs17198726	-0.0454967	C	T	Cells Cultured Fibroblasts	0.020496	JTI
	CD163	rs11054513	0.0582449	T	C	Cells Cultured Fibroblasts	0.020496	JTI
	CD163	rs10845427	0.018594	T	C	Cells Cultured Fibroblasts	0.020496	JTI
	CD163	rs73047192	-0.0877358	C	T	Cells Cultured Fibroblasts	0.020496	JTI
	CD163	rs79894691	-0.0420488	G	A	Heart Atrial Appendage	0.0164414	JTI
	CD163	rs35480970	0.189436	A	G	Liver	0.0436972	JTI
	CD163	rs11053562	-0.209286	G	A	Liver	0.0436972	JTI
	CD163	rs7488360	-0.0117487	T	C	Liver	0.0436972	JTI
	CD163	rs10431296	-0.076429	T	C	Liver	0.0436972	JTI
	CD163	rs139638620	-0.0572099	G	A	Liver	0.0436972	JTI
	CD163	rs7486933	-0.181667	A	G	Liver	0.0436972	JTI
	CD163	rs76248955	-0.0659052	T	G	Liver	0.0436972	JTI
	CD163	rs12304718	0.123726	T	C	Liver	0.0436972	JTI
	CD163	rs10845427	0.0771902	T	C	Liver	0.0436972	JTI
	CD163	rs11064242	0.0440501	G	A	Lung	0.0236277	PrediXcan
	CD163	rs3742086	0.0286562	C	T	Lung	0.0236277	PrediXcan
	CD163	rs12309792	0.037332	T	C	Lung	0.0236277	PrediXcan
	CD163	rs4269991	0.000262465	C	T	Lung	0.0236277	PrediXcan
	CD163	rs17791867	-0.0527311	C	T	Lung	0.0236277	PrediXcan
	CD163	rs10744135	-0.0127022	G	A	Lung	0.0236277	PrediXcan
	CD163	rs11043661	-0.00580404	A	G	Lung	0.0236277	PrediXcan
	CD163	rs4883086	0.0198966	C	A	Lung	0.0236277	PrediXcan
	CD163	rs2968740	-0.140292	G	A	Lung	0.0236277	PrediXcan
	CD163	rs139638620	-0.0790749	G	A	Minor Salivary Gland	0.0850851	JTI
	CD163	rs79894691	-0.115736	G	A	Minor Salivary Gland	0.0850851	JTI
	CD163	rs73043456	0.276918	G	A	Minor Salivary Gland	0.0850851	JTI
	CD163	rs7488523	-0.0173369	C	T	Nerve Tibial	0.0166565	JTI
	CD163	rs139638620	-0.0550685	G	A	Nerve Tibial	0.0166565	JTI
	CD163	rs79894691	-0.0924427	G	A	Nerve Tibial	0.0166565	JTI
	CD163	rs12302881	-0.0512303	A	G	Nerve Tibial	0.0166565	JTI
	CD163	rs11054398	-0.0217164	A	G	Nerve Tibial	0.0166565	JTI
	CD163	rs11054398	-0.227103	A	G	Pancreas	0.0141476	JTI
	CD163	rs1045553	-0.00155864	A	G	Pituitary	0.0191642	PrediXcan
	CD163	rs17198726	-0.00819406	C	T	Pituitary	0.0191642	PrediXcan
	CD163	rs10772596	-0.00932683	C	T	Pituitary	0.0191642	PrediXcan
	CD163	rs35574503	0.130644	G	A	Pituitary	0.0191642	PrediXcan
	CD163	rs7968345	0.13081	G	A	Pituitary	0.0191642	PrediXcan
	CD163	rs2465462	-0.0819958	A	G	Pituitary	0.0191642	PrediXcan
	CD163	rs139638620	-0.017186	G	A	Skin Not Sun Exposed Suprapubic	0.0103222	JTI
	CD163	rs79894691	-0.0771329	G	A	Skin Not Sun Exposed Suprapubic	0.0103222	JTI
	CD163	rs12302881	-0.0197409	A	G	Skin Not Sun Exposed Suprapubic	0.0103222	JTI
	CD163	rs73059746	0.0995933	G	A	Testis	0.0872038	JTI
	CD163	rs7488523	-0.179089	C	T	Testis	0.0872038	JTI
	CD163	rs139638620	-0.0887489	G	A	Testis	0.0872038	JTI
	CD163	rs7956873	0.00964311	T	G	Testis	0.0872038	JTI
	CD163	rs6488336	-0.168907	A	G	Testis	0.0872038	JTI
	CD163	rs7980201	0.0964997	C	T	Testis	0.0872038	JTI
	CD163	rs12302881	-0.11533	A	G	Testis	0.0872038	JTI
	CD163	rs77555760	0.000158951	A	G	Testis	0.0872038	JTI
	CD163	rs11054398	-0.025651	A	G	Testis	0.0872038	JTI
	CD163	rs17198726	-0.105658	C	T	Testis	0.0872038	JTI
	CD163	rs10845427	0.083103	T	C	Testis	0.0872038	JTI
	CD163	rs10845431	0.254057	A	G	Testis	0.0872038	JTI
	CD163	rs115219271	0.179889	T	C	Testis	0.0872038	JTI
	CD163	rs73047192	0.0450013	C	T	Testis	0.0872038	JTI
	CD163	rs10842265	-0.00376155	C	T	Whole Blood	0.0157953	JTI
	CD163	rs7311869	0.0913025	G	A	Whole Blood	0.0157953	JTI
	CXCL12	rs10899794	0.0642426	T	C	Adipose Subcutaneous	0.021156	PrediXcan
	CXCL12	rs2248807	-0.0117757	C	T	Adipose Subcutaneous	0.021156	PrediXcan
	CXCL12	rs3006393	0.0392721	T	C	Adipose Subcutaneous	0.021156	PrediXcan
	CXCL12	rs117880176	-0.00468052	C	T	Adipose Subcutaneous	0.021156	PrediXcan
	CXCL12	rs78015036	-0.123419	C	T	Adipose Subcutaneous	0.021156	PrediXcan
	CXCL12	rs10899838	0.0611112	T	C	Adipose Subcutaneous	0.021156	PrediXcan
	CXCL12	rs74138194	-0.0237397	A	G	Adipose Subcutaneous	0.021156	PrediXcan
	CXCL12	rs10899852	-0.0434232	C	T	Adipose Subcutaneous	0.021156	PrediXcan
	CXCL12	rs11238621	0.112642	C	T	Adipose Subcutaneous	0.021156	PrediXcan
	CXCL12	rs72792664	0.00570727	G	A	Adipose Subcutaneous	0.021156	PrediXcan
	CXCL12	rs186653687	-0.0037655	C	T	Adipose Subcutaneous	0.021156	PrediXcan
	CXCL12	rs73268420	0.109987	A	C	Adipose Subcutaneous	0.021156	PrediXcan
	CXCL12	rs12220592	-0.0543073	G	A	Adipose Subcutaneous	0.021156	PrediXcan
	CXCL12	rs1254853	-0.0506227	C	T	Adipose Subcutaneous	0.021156	PrediXcan
	CXCL12	rs1254861	-0.0214394	C	T	Adipose Subcutaneous	0.021156	PrediXcan
	CXCL12	rs1147907	-0.0317141	G	A	Adipose Subcutaneous	0.021156	PrediXcan
	CXCL12	rs2279555	-0.11002	A	G	Adipose Subcutaneous	0.021156	PrediXcan
	CXCL12	rs11238823	0.0947261	A	G	Adipose Subcutaneous	0.021156	PrediXcan
	CXCL12	rs268322	-0.0207084	C	T	Adipose Subcutaneous	0.021156	PrediXcan
	CXCL12	rs75546245	0.0619313	C	T	Adipose Subcutaneous	0.021156	PrediXcan
	CXCL12	rs1029153	0.0160177	A	G	Adipose Subcutaneous	0.021156	PrediXcan
	CXCL12	rs750011	-0.0143406	G	A	Adipose Subcutaneous	0.021156	PrediXcan
	CXCL12	rs112366497	-0.00924893	G	T	Adipose Subcutaneous	0.021156	PrediXcan
	CXCL12	rs4948900	-0.0416213	G	A	Adipose Subcutaneous	0.021156	PrediXcan
	CXCL12	rs1147967	-0.00135083	G	A	Adipose Subcutaneous	0.021156	PrediXcan
	CXCL12	rs1413514	0.0315583	T	C	Adipose Subcutaneous	0.021156	PrediXcan
	CXCL12	rs35967100	0.0545731	C	T	Adipose Subcutaneous	0.021156	PrediXcan
	CXCL12	rs77389891	-0.00967471	G	A	Adipose Subcutaneous	0.021156	PrediXcan
	CXCL12	rs78157195	-0.0339638	C	T	Adipose Subcutaneous	0.021156	PrediXcan
	CXCL12	rs35815495	-0.0763819	G	A	Adipose Subcutaneous	0.021156	PrediXcan
	CXCL12	rs12266568	-0.024846	T	C	Adipose Subcutaneous	0.021156	PrediXcan
	CXCL12	rs35004605	-0.0363889	T	C	Adipose Subcutaneous	0.021156	PrediXcan
	CXCL12	rs67163130	-0.112299	G	A	Adipose Subcutaneous	0.021156	PrediXcan
	CXCL12	rs870204	0.00346571	C	T	Adipose Subcutaneous	0.021156	PrediXcan
	CXCL12	rs59626742	0.00789784	T	C	Adipose Subcutaneous	0.021156	PrediXcan
	CXCL12	rs56277921	-0.0056205	C	A	Adipose Subcutaneous	0.021156	PrediXcan
	CXCL12	rs74731216	-0.0572398	G	T	Adipose Subcutaneous	0.021156	PrediXcan
	CXCL12	rs11238755	-0.0860757	C	A	Brain Cerebellum	0.0329612	JTI
	CXCL12	rs4519046	0.137668	G	A	Brain Hippocampus	0.0260073	PrediXcan
	CXCL12	rs2999291	0.00526722	C	T	Brain Hippocampus	0.0260073	PrediXcan
	CXCL12	rs72788952	-0.0668646	C	T	Brain Hippocampus	0.0260073	PrediXcan
	CXCL12	rs12765058	-0.0788934	T	C	Brain Hippocampus	0.0260073	PrediXcan
	CXCL12	rs3128244	-0.121879	G	A	Brain Hippocampus	0.0260073	PrediXcan
	CXCL12	rs117046105	-0.0231964	C	T	Brain Hippocampus	0.0260073	PrediXcan
	CXCL12	rs189723	0.0762573	C	T	Brain Hippocampus	0.0260073	PrediXcan
	CXCL12	rs174850	0.07597	C	T	Brain Hippocampus	0.0260073	PrediXcan
	CXCL12	rs11238970	0.0851876	T	C	Brain Hippocampus	0.0260073	PrediXcan
	CXCL12	rs12357182	0.0566341	G	A	Brain Hippocampus	0.0260073	PrediXcan
	CXCL12	rs56669001	0.000404729	G	T	Brain Hippocampus	0.0260073	PrediXcan
	CXCL12	rs10900145	0.0199668	G	T	Brain Hippocampus	0.0260073	PrediXcan
	CXCL12	rs4367906	-0.0326767	C	T	Heart Atrial Appendage	0.0706851	PrediXcan
	CXCL12	rs7077713	-0.0696178	G	A	Heart Atrial Appendage	0.0706851	PrediXcan
	CXCL12	rs58585629	-0.0235447	C	A	Heart Atrial Appendage	0.0706851	PrediXcan
	CXCL12	rs3128243	0.0318047	G	A	Heart Atrial Appendage	0.0706851	PrediXcan
	CXCL12	rs11238621	-0.0107624	C	T	Heart Atrial Appendage	0.0706851	PrediXcan
	CXCL12	rs73266519	-0.00256874	C	T	Heart Atrial Appendage	0.0706851	PrediXcan
	CXCL12	rs951260	-0.105147	G	A	Heart Atrial Appendage	0.0706851	PrediXcan
	CXCL12	rs1107926	-0.177262	C	T	Heart Atrial Appendage	0.0706851	PrediXcan
	CXCL12	rs11238718	0.00336372	T	C	Heart Atrial Appendage	0.0706851	PrediXcan
	CXCL12	rs12220592	0.0152879	G	A	Heart Atrial Appendage	0.0706851	PrediXcan
	CXCL12	rs78197031	0.0303839	A	G	Heart Atrial Appendage	0.0706851	PrediXcan
	CXCL12	rs77830065	0.280314	A	G	Heart Atrial Appendage	0.0706851	PrediXcan
	CXCL12	rs75649433	-0.126098	G	A	Heart Atrial Appendage	0.0706851	PrediXcan
	CXCL12	rs2798995	0.0652201	G	A	Heart Atrial Appendage	0.0706851	PrediXcan
	CXCL12	rs2863230	-0.0243986	A	G	Heart Atrial Appendage	0.0706851	PrediXcan
	CXCL12	rs150732849	0.0644158	T	C	Heart Atrial Appendage	0.0706851	PrediXcan
	CXCL12	rs268297	-0.0505516	C	A	Heart Atrial Appendage	0.0706851	PrediXcan
	CXCL12	rs268293	-0.0494764	A	G	Heart Atrial Appendage	0.0706851	PrediXcan
	CXCL12	rs10160170	-0.0139023	A	G	Heart Atrial Appendage	0.0706851	PrediXcan
	CXCL12	rs12570491	0.0750746	G	T	Heart Atrial Appendage	0.0706851	PrediXcan
	CXCL12	rs736136	0.019572	G	A	Heart Atrial Appendage	0.0706851	PrediXcan
	CXCL12	rs11238970	-0.108708	T	C	Heart Atrial Appendage	0.0706851	PrediXcan
	CXCL12	rs800329	-0.0535157	C	A	Heart Atrial Appendage	0.0706851	PrediXcan
	CXCL12	rs2505738	-0.0177475	C	A	Heart Atrial Appendage	0.0706851	PrediXcan
	CXCL12	rs266075	-0.102964	T	C	Heart Atrial Appendage	0.0706851	PrediXcan
	CXCL12	rs266102	0.00511377	T	C	Heart Atrial Appendage	0.0706851	PrediXcan
	CXCL12	rs266101	0.0249696	G	A	Heart Atrial Appendage	0.0706851	PrediXcan
	CXCL12	rs17156193	-0.0216916	A	G	Heart Atrial Appendage	0.0706851	PrediXcan
	CXCL12	rs17883887	-0.0224216	T	C	Heart Atrial Appendage	0.0706851	PrediXcan
	CXCL12	rs4556491	-0.0363124	G	A	Heart Atrial Appendage	0.0706851	PrediXcan
	CXCL12	rs4520555	0.000774401	C	A	Heart Atrial Appendage	0.0706851	PrediXcan
	CXCL12	rs1892037	0.0673205	A	G	Heart Atrial Appendage	0.0706851	PrediXcan
	CXCL12	rs2799713	0.0226542	T	C	Heart Atrial Appendage	0.0706851	PrediXcan
	CXCL12	rs1857502	0.0041525	G	T	Heart Atrial Appendage	0.0706851	PrediXcan
	CXCL12	rs11239130	0.0156742	A	G	Heart Atrial Appendage	0.0706851	PrediXcan
	CXCL12	rs11598934	0.299452	G	A	Heart Atrial Appendage	0.0706851	PrediXcan
	CXCL12	rs17156638	-0.0701961	G	A	Heart Atrial Appendage	0.0706851	PrediXcan
	CXCL12	rs1994003	0.0109469	C	A	Heart Atrial Appendage	0.0706851	PrediXcan
	CXCL12	rs7917926	0.0924939	G	A	Heart Atrial Appendage	0.0706851	PrediXcan
	CXCL12	rs2281841	-0.0175329	C	T	Heart Atrial Appendage	0.0706851	PrediXcan
	CXCL12	rs11239282	0.00734079	G	A	Heart Atrial Appendage	0.0706851	PrediXcan
	CXCL12	rs17515726	-0.023743	T	C	Heart Atrial Appendage	0.0706851	PrediXcan
	CXCL12	rs10900141	-0.093804	A	G	Heart Atrial Appendage	0.0706851	PrediXcan
	CXCL12	rs74731216	-0.0495148	G	T	Heart Atrial Appendage	0.0706851	PrediXcan
	CXCL12	rs12783875	0.181006	T	C	Heart Atrial Appendage	0.0706851	PrediXcan
	CXCL12	rs11239394	0.00250158	T	C	Heart Atrial Appendage	0.0706851	PrediXcan
	CXCL12	rs141429003	-0.304782	C	A	Minor Salivary Gland	0.0589657	JTI
	CXCL12	rs266104	-0.047108	T	C	Minor Salivary Gland	0.0589657	JTI
	CXCL12	rs266103	-0.0823435	C	T	Minor Salivary Gland	0.0589657	JTI
	CXCL12	rs754618	0.0974546	C	T	Minor Salivary Gland	0.0589657	JTI
	CXCL12	rs74999852	-0.0683449	T	C	Minor Salivary Gland	0.0589657	JTI
	CXCL12	rs1779344	0.0374197	C	A	Minor Salivary Gland	0.0589657	JTI
	CXCL12	rs12774899	-0.234923	G	A	Minor Salivary Gland	0.0589657	JTI
	CXCL12	rs112366497	-0.284454	G	T	Minor Salivary Gland	0.0589657	JTI
	CXCL12	rs7089311	0.101942	C	T	Minor Salivary Gland	0.0589657	JTI
	CXCL12	rs1970628	0.0121024	C	T	Minor Salivary Gland	0.0589657	JTI
	CXCL12	rs10900040	-0.133482	T	C	Nerve Tibial	0.0114057	JTI
	CXCL12	rs1266391	0.0230896	C	A	Nerve Tibial	0.0114057	JTI
	CXCL12	rs10793518	-0.277823	G	A	Ovary	0.069041	JTI
	CXCL12	rs2818912	-0.0335025	C	T	Ovary	0.069041	JTI
	CXCL12	rs1253722	-0.0340539	G	A	Ovary	0.069041	JTI
	CXCL12	rs1144485	0.366271	T	C	Pancreas	0.196443	JTI
	CXCL12	rs751426	-0.0413459	G	A	Pancreas	0.196443	JTI
	CXCL12	rs880174	-0.0124861	G	A	Pituitary	0.0322661	JTI
	CXCL12	rs12778895	0.0759379	G	T	Pituitary	0.0322661	JTI
	CXCL12	rs2236534	0.127794	G	T	Pituitary	0.0322661	JTI
	CXCL12	rs2760669	-0.0739452	A	G	Pituitary	0.0322661	JTI
	CXCL12	rs67584078	-0.270926	C	T	Pituitary	0.0322661	JTI
	CXCL12	rs11238970	-0.103937	T	C	Small Intestine	0.05977365	JTI
	CXCL12	rs266075	0.183412	T	C	Small Intestine	0.05977365	JTI
	CXCL12	rs266108	0.415614	G	A	Small Intestine	0.05977365	JTI
	CXCL12	rs11239007	-0.0173309	G	A	Small Intestine	0.05977365	JTI
	CXCL12	rs34858270	-0.0497064	T	C	Small Intestine	0.05977365	JTI
	CXCL12	rs1253738	0.151187	G	A	Small Intestine	0.05977365	JTI
	CXCL12	rs112366497	-0.162905	G	T	Small Intestine	0.05977365	JTI
	CXCL12	rs7089311	-0.156769	C	T	Small Intestine	0.05977365	JTI
	CXCL12	rs7068859	-0.0455823	T	C	Testis	0.0882023	PrediXcan
	CXCL12	rs7097453	0.135156	A	G	Testis	0.0882023	PrediXcan
	CXCL12	rs117415520	0.073869	C	T	Testis	0.0882023	PrediXcan
	CXCL12	rs12572433	0.000882758	G	A	Testis	0.0882023	PrediXcan
	CXCL12	rs2279555	-0.0919042	A	G	Testis	0.0882023	PrediXcan
	CXCL12	rs10899960	-0.0196134	A	C	Testis	0.0882023	PrediXcan
	CXCL12	rs6593384	-0.021346	A	G	Testis	0.0882023	PrediXcan
	CXCL12	rs10899963	0.0122625	T	G	Testis	0.0882023	PrediXcan
	CXCL12	rs12412267	-0.0381618	G	A	Testis	0.0882023	PrediXcan
	CXCL12	rs35484462	-0.0855612	T	C	Testis	0.0882023	PrediXcan
	CXCL12	rs268307	-0.0229244	C	T	Testis	0.0882023	PrediXcan
	CXCL12	rs1905150	-0.00699918	G	A	Testis	0.0882023	PrediXcan
	CXCL12	rs800329	-0.0134242	C	A	Testis	0.0882023	PrediXcan
	CXCL12	rs17391002	0.0546185	A	G	Testis	0.0882023	PrediXcan
	CXCL12	rs266104	-0.0663073	T	C	Testis	0.0882023	PrediXcan
	CXCL12	rs17482472	0.0984488	G	A	Testis	0.0882023	PrediXcan
	CXCL12	rs72792933	0.0147874	A	C	Testis	0.0882023	PrediXcan
	CXCL12	rs1253752	-0.0717077	G	T	Testis	0.0882023	PrediXcan
	CXCL12	rs1413514	0.124632	T	C	Testis	0.0882023	PrediXcan
	CXCL12	rs11239112	0.040495	G	A	Testis	0.0882023	PrediXcan
	CXCL12	rs11239130	0.0604802	A	G	Testis	0.0882023	PrediXcan
	CXCL12	rs11239188	-0.0175373	C	T	Testis	0.0882023	PrediXcan
	CXCL12	rs12764414	-0.0228675	C	T	Testis	0.0882023	PrediXcan
	CXCL12	rs2477530	0.0725858	T	G	Testis	0.0882023	PrediXcan
	CXCL12	rs7077064	-0.0223598	G	A	Testis	0.0882023	PrediXcan
	CXCL12	rs4948915	-0.0142629	G	A	Testis	0.0882023	PrediXcan
	CXCL12	rs72780665	-0.027048	C	T	Testis	0.0882023	PrediXcan
	CXCL12	rs968565	0.0390818	C	T	Testis	0.0882023	PrediXcan
	CXCL12	rs3740094	-0.0157714	C	T	Testis	0.0882023	PrediXcan
	CXCL12	rs41301609	0.0734169	G	A	Testis	0.0882023	PrediXcan
	CXCL12	rs113826632	0.00107012	T	C	Testis	0.0882023	PrediXcan
	CXCL12	rs10793582	0.00594287	G	A	Testis	0.0882023	PrediXcan
	CXCL12	rs12359879	0.0129426	G	T	Testis	0.0882023	PrediXcan
	CXCL12	rs58167894	0.0508596	G	A	Testis	0.0882023	PrediXcan
	CXCL12	rs78584704	0.0228798	G	A	Vagina	0.0439625	JTI
	CXCL12	rs7909314	-0.118074	G	A	Vagina	0.0439625	JTI
	CXCL12	rs76274553	0.182513	C	T	Vagina	0.0439625	JTI
	CXCL12	rs266108	0.0597194	G	A	Vagina	0.0439625	JTI
	CXCL12	rs1029153	0.00343224	A	G	Vagina	0.0439625	JTI
	CXCL12	rs12774899	-0.005805	G	A	Vagina	0.0439625	JTI
	CXCL12	rs1109423	0.21289	G	A	Vagina	0.0439625	JTI
	CXCL12	rs75615361	0.0664343	T	C	Vagina	0.0439625	JTI
	CXCL12	rs10900142	0.0118446	G	T	Vagina	0.0439625	JTI
	CXCL12	rs870204	-0.0350091	C	T	Vagina	0.0439625	JTI
	CXCL12	rs12263146	-0.0631539	G	A	Vagina	0.0439625	JTI
	CXCL12	rs12783875	0.0102049	T	C	Vagina	0.0439625	JTI
	CXCL12	rs111916157	0.219028	A	G	Vagina	0.0439625	JTI

## Sheet: Table S7
Supplemental Table 7: Inflammatory GREX Associations with Atherosclerotic Phenotypes in BioVU Individuals of European Ancestry
Tissue_Gene GREX	Phenotype code	beta	SE	p	n_total	n_cases	n_controls	Phenotype description	Bonferroni significant	Nominal significant
Brain_Hippocampus_CXCL12	411	-0.240705	0.0772178	0.00182567	58973	10160	48813	Ischemic Heart Disease	TRUE	TRUE
Brain_Hippocampus_CXCL12	411.4	-0.247573	0.0809912	0.00223725	58035	9222	48813	Coronary atherosclerosis	TRUE	TRUE
Ovary_CXCL12	411	0.226791	0.0784133	0.0038249	58973	10160	48813	Ischemic Heart Disease	TRUE	TRUE
Ovary_CXCL12	411.4	0.234143	0.0821831	0.00438506	58035	9222	48813	Coronary atherosclerosis	TRUE	TRUE
MinorSalivaryGland_CD163	411.2	0.371933	0.163531	0.0229431	52175	3362	48813	Myocardial infarction	FALSE	TRUE
EsophagusMuscularis_ABCA1	411.2	-1.13498	0.515442	0.0276687	52175	3362	48813	Myocardial infarction	FALSE	TRUE
Testis_CD163	411.2	0.171201	0.0835505	0.0404548	52175	3362	48813	Myocardial infarction	FALSE	TRUE
HeartAtrialAppendage_CD163	411.2	2.54568	1.24451	0.0408023	52175	3362	48813	Myocardial infarction	FALSE	TRUE
ArteryAorta_CD163	411.2	1.36499	0.670352	0.041728	52175	3362	48813	Myocardial infarction	FALSE	TRUE
SkinNotSunExposed_CD163	411.2	1.25677	0.619385	0.0424525	52175	3362	48813	Myocardial infarction	FALSE	TRUE
Brain_Hippocampus_CXCL12	411.2	-0.235906	0.117153	0.044045	52175	3362	48813	Myocardial infarction	FALSE	TRUE
Ovary_CXCL12	411.2	0.23637	0.118869	0.0467577	52175	3362	48813	Myocardial infarction	FALSE	TRUE
EsophagusMuscularis_ABCA1	411	-0.636786	0.336663	0.0585626	58973	10160	48813	Ischemic Heart Disease	FALSE	FALSE
MinorSalivaryGland_CD163	411	0.204445	0.109833	0.062687	58973	10160	48813	Ischemic Heart Disease	FALSE	FALSE
NerveTibial_CD163	411.2	0.694281	0.383948	0.0705644	52175	3362	48813	Myocardial infarction	FALSE	FALSE
HeartAtrialAppendage_CD163	411	1.40492	0.809167	0.0825177	58973	10160	48813	Ischemic Heart Disease	FALSE	FALSE
Testis_CXCL12	411	0.0923194	0.0555824	0.0967241	58973	10160	48813	Ischemic Heart Disease	FALSE	FALSE
MinorSalivaryGland_CD163	411.4	0.189331	0.115157	0.100154	58035	9222	48813	Coronary atherosclerosis	FALSE	FALSE
HeartAtrialAppendage_CXCL12	411.4	0.0799956	0.0493341	0.104909	58035	9222	48813	Coronary atherosclerosis	FALSE	FALSE
HeartLeftVentricle_ABCA1	411.2	-1.58048	0.987808	0.1096	52175	3362	48813	Myocardial infarction	FALSE	FALSE
ArteryAorta_CD163	411	0.683466	0.436774	0.117629	58973	10160	48813	Ischemic Heart Disease	FALSE	FALSE
HeartAtrialAppendage_CXCL12	411	0.073006	0.0470441	0.120695	58973	10160	48813	Ischemic Heart Disease	FALSE	FALSE
EsophagusMuscularis_ABCA1	411.4	-0.545906	0.352819	0.121799	58035	9222	48813	Coronary atherosclerosis	FALSE	FALSE
SkinNotSunExposed_CD163	411	0.624022	0.403598	0.122069	58973	10160	48813	Ischemic Heart Disease	FALSE	FALSE
HeartAtrialAppendage_CD163	411.4	1.30457	0.846773	0.123405	58035	9222	48813	Coronary atherosclerosis	FALSE	FALSE
SkinSunExposed_ABCA1	411.2	-0.967737	0.63951	0.130216	52175	3362	48813	Myocardial infarction	FALSE	FALSE
ArteryAorta_CD163	411.4	0.67894	0.457616	0.137903	58035	9222	48813	Coronary atherosclerosis	FALSE	FALSE
Liver_ABCA1	411.2	0.189897	0.128662	0.139962	52175	3362	48813	Myocardial infarction	FALSE	FALSE
SkinNotSunExposed_CD163	411.4	0.621256	0.422882	0.141805	58035	9222	48813	Coronary atherosclerosis	FALSE	FALSE
MinorSalivaryGland_CXCL12	411	0.0765949	0.0544911	0.159831	58973	10160	48813	Ischemic Heart Disease	FALSE	FALSE
NerveTibial_CD163	411.4	0.368694	0.26376	0.162162	58035	9222	48813	Coronary atherosclerosis	FALSE	FALSE
NerveTibial_CD163	411	0.344269	0.251417	0.1709	58973	10160	48813	Ischemic Heart Disease	FALSE	FALSE
HeartLeftVentricle_ABCA1	411	-0.8517	0.646165	0.187475	58973	10160	48813	Ischemic Heart Disease	FALSE	FALSE
ArteryAorta_ABCA1	411.2	2.09632	1.65738	0.205928	52175	3362	48813	Myocardial infarction	FALSE	FALSE
Testis_CXCL12	411.4	0.0708378	0.0582961	0.224314	58035	9222	48813	Coronary atherosclerosis	FALSE	FALSE
SkinSunExposed_ABCA1	411	-0.503211	0.418364	0.229052	58973	10160	48813	Ischemic Heart Disease	FALSE	FALSE
Testis_CXCL12	411.2	0.100103	0.0838735	0.232674	52175	3362	48813	Myocardial infarction	FALSE	FALSE
Pancreas_CXCL12	411.4	0.0567728	0.0481867	0.238723	58035	9222	48813	Coronary atherosclerosis	FALSE	FALSE
Pancreas_CXCL12	411	0.0535081	0.0459466	0.244192	58973	10160	48813	Ischemic Heart Disease	FALSE	FALSE
MinorSalivaryGland_CXCL12	411.4	0.0632013	0.0570661	0.268074	58035	9222	48813	Coronary atherosclerosis	FALSE	FALSE
Vagina_CXCL12	411	0.0528085	0.0538745	0.32698	58973	10160	48813	Ischemic Heart Disease	FALSE	FALSE
CellsCulturedFibroblasts_ABCA1	411.2	-0.210523	0.221904	0.342767	52175	3362	48813	Myocardial infarction	FALSE	FALSE
Brain_Cerebellum_CXCL12	411	0.200483	0.211868	0.344015	58973	10160	48813	Ischemic Heart Disease	FALSE	FALSE
MuscleSkeletal_ABCA1	411.2	-0.105126	0.111174	0.344353	52175	3362	48813	Myocardial infarction	FALSE	FALSE
Testis_CD163	411.4	0.0536435	0.0583868	0.358221	58035	9222	48813	Coronary atherosclerosis	FALSE	FALSE
SmallIntestine_CXCL12	411.2	0.0694059	0.0769614	0.367148	52175	3362	48813	Myocardial infarction	FALSE	FALSE
Vagina_CXCL12	411.2	0.0719373	0.0814014	0.376839	52175	3362	48813	Myocardial infarction	FALSE	FALSE
MuscleSkeletal_ABCA1	411	-0.0625798	0.0730944	0.391914	58973	10160	48813	Ischemic Heart Disease	FALSE	FALSE
ArteryAorta_ABCA1	411.4	0.950601	1.1529	0.409638	58035	9222	48813	Coronary atherosclerosis	FALSE	FALSE
CellsCulturedFibroblasts_CD163	411	0.0810326	0.099503	0.415431	58973	10160	48813	Ischemic Heart Disease	FALSE	FALSE
MuscleSkeletal_ABCA1	411.4	-0.0618232	0.0766754	0.420071	58035	9222	48813	Coronary atherosclerosis	FALSE	FALSE
HeartLeftVentricle_ABCA1	411.4	-0.530331	0.676754	0.433252	58035	9222	48813	Coronary atherosclerosis	FALSE	FALSE
Testis_CD163	411	0.0431914	0.0556554	0.437719	58973	10160	48813	Ischemic Heart Disease	FALSE	FALSE
Liver_CD163	411.4	0.0637066	0.0844172	0.450451	58035	9222	48813	Coronary atherosclerosis	FALSE	FALSE
AdrenalGland_ABCA1	411.4	0.0435422	0.0591624	0.461744	58035	9222	48813	Coronary atherosclerosis	FALSE	FALSE
Liver_CD163	411.2	0.0890938	0.121251	0.46247	52175	3362	48813	Myocardial infarction	FALSE	FALSE
MinorSalivaryGland_CXCL12	411.2	0.0601827	0.0823414	0.464845	52175	3362	48813	Myocardial infarction	FALSE	FALSE
Vagina_CXCL12	411.4	0.0391051	0.0565079	0.488919	58035	9222	48813	Coronary atherosclerosis	FALSE	FALSE
AdrenalGland_ABCA1	411.2	0.0578711	0.0857353	0.499678	52175	3362	48813	Myocardial infarction	FALSE	FALSE
BreastMammary_ABCA1	411	0.0667255	0.100197	0.505448	58973	10160	48813	Ischemic Heart Disease	FALSE	FALSE
Pancreas_CD163	411	0.113822	0.172099	0.508373	58973	10160	48813	Ischemic Heart Disease	FALSE	FALSE
SkinSunExposed_ABCA1	411.4	-0.287862	0.438161	0.511195	58035	9222	48813	Coronary atherosclerosis	FALSE	FALSE
ArteryAorta_ABCA1	411	0.712788	1.10021	0.517074	58973	10160	48813	Ischemic Heart Disease	FALSE	FALSE
BreastMammary_ABCA1	411.2	-0.0978247	0.151919	0.519622	52175	3362	48813	Myocardial infarction	FALSE	FALSE
SmallIntestine_CXCL12	411.4	0.0342616	0.0538074	0.524291	58035	9222	48813	Coronary atherosclerosis	FALSE	FALSE
BreastMammary_ABCA1	411.4	0.0663718	0.10499	0.527272	58035	9222	48813	Coronary atherosclerosis	FALSE	FALSE
CellsCulturedFibroblasts_ABCA1	411	-0.0926667	0.146745	0.527726	58973	10160	48813	Ischemic Heart Disease	FALSE	FALSE
Brain_Cerebellum_CXCL12	411.4	0.139715	0.22211	0.529325	58035	9222	48813	Coronary atherosclerosis	FALSE	FALSE
SmallIntestine_CXCL12	411	0.0321084	0.0513047	0.531422	58973	10160	48813	Ischemic Heart Disease	FALSE	FALSE
Pancreas_CD163	411.4	0.112826	0.180372	0.531631	58035	9222	48813	Coronary atherosclerosis	FALSE	FALSE
EsophagusMucosa_ABCA1	411	0.096835	0.155407	0.533214	58973	10160	48813	Ischemic Heart Disease	FALSE	FALSE
Pituitary_CD163	411	0.0868456	0.146008	0.551978	58973	10160	48813	Ischemic Heart Disease	FALSE	FALSE
Pituitary_CXCL12	411	0.0534245	0.0916142	0.559795	58973	10160	48813	Ischemic Heart Disease	FALSE	FALSE
ArteryTibial_ABCA1	411.2	-0.0717534	0.126069	0.569249	52175	3362	48813	Myocardial infarction	FALSE	FALSE
Lung_CD163	411.4	-0.129546	0.232204	0.576914	58035	9222	48813	Coronary atherosclerosis	FALSE	FALSE
CellsCulturedFibroblasts_ABCA1	411.4	-0.0834329	0.153946	0.587843	58035	9222	48813	Coronary atherosclerosis	FALSE	FALSE
Brain_Cerebellum_CXCL12	411.2	0.170716	0.32072	0.594525	52175	3362	48813	Myocardial infarction	FALSE	FALSE
EsophagusMucosa_ABCA1	411.4	0.0850446	0.163058	0.601977	58035	9222	48813	Coronary atherosclerosis	FALSE	FALSE
AdrenalGland_ABCA1	411	0.0291439	0.0563806	0.605216	58973	10160	48813	Ischemic Heart Disease	FALSE	FALSE
HeartAtrialAppendage_CXCL12	411.2	0.036813	0.0712602	0.605435	52175	3362	48813	Myocardial infarction	FALSE	FALSE
NerveTibial_CXCL12	411.2	-0.110679	0.244449	0.650714	52175	3362	48813	Myocardial infarction	FALSE	FALSE
Pituitary_CXCL12	411.4	0.042586	0.0961269	0.657752	58035	9222	48813	Coronary atherosclerosis	FALSE	FALSE
CellsCulturedFibroblasts_CD163	411.2	0.0640885	0.150139	0.669481	52175	3362	48813	Myocardial infarction	FALSE	FALSE
Lung_CD163	411	-0.0893836	0.221349	0.686351	58973	10160	48813	Ischemic Heart Disease	FALSE	FALSE
AdrenalGland_CD163	411.4	-0.0274984	0.0687544	0.689192	58035	9222	48813	Coronary atherosclerosis	FALSE	FALSE
WholeBlood_CD163	411.2	0.106014	0.29174	0.716317	52175	3362	48813	Myocardial infarction	FALSE	FALSE
EsophagusMucosa_ABCA1	411.2	0.0749053	0.235299	0.750227	52175	3362	48813	Myocardial infarction	FALSE	FALSE
Pituitary_CXCL12	411.2	0.0430544	0.13897	0.756705	52175	3362	48813	Myocardial infarction	FALSE	FALSE
ArteryTibial_ABCA1	411	0.0258214	0.08378	0.757926	58973	10160	48813	Ischemic Heart Disease	FALSE	FALSE
NerveTibial_CXCL12	411.4	0.0474232	0.170006	0.780283	58035	9222	48813	Coronary atherosclerosis	FALSE	FALSE
Pituitary_CD163	411.2	-0.0601257	0.221616	0.786156	52175	3362	48813	Myocardial infarction	FALSE	FALSE
AdiposeSubcutaneous_CXCL12	411.2	0.0300416	0.114233	0.792561	52175	3362	48813	Myocardial infarction	FALSE	FALSE
Pancreas_CXCL12	411.2	-0.0170092	0.0695688	0.806848	52175	3362	48813	Myocardial infarction	FALSE	FALSE
Liver_ABCA1	411.4	-0.0189535	0.0887038	0.830803	58035	9222	48813	Coronary atherosclerosis	FALSE	FALSE
WholeBlood_CD163	411.4	-0.03793	0.202749	0.851599	58035	9222	48813	Coronary atherosclerosis	FALSE	FALSE
WholeBlood_CD163	411	-0.0356642	0.193388	0.853686	58973	10160	48813	Ischemic Heart Disease	FALSE	FALSE
ArteryTibial_ABCA1	411.4	0.0137286	0.0877788	0.875718	58035	9222	48813	Coronary atherosclerosis	FALSE	FALSE
Pituitary_CD163	411.4	0.0233138	0.153604	0.879361	58035	9222	48813	Coronary atherosclerosis	FALSE	FALSE
Liver_ABCA1	411	-0.0125077	0.0845423	0.882385	58973	10160	48813	Ischemic Heart Disease	FALSE	FALSE
Pancreas_CD163	411.2	0.0384094	0.260558	0.882807	52175	3362	48813	Myocardial infarction	FALSE	FALSE
AdrenalGland_CD163	411.2	0.0115076	0.0990264	0.907488	52175	3362	48813	Myocardial infarction	FALSE	FALSE
Lung_CD163	411.2	0.0348481	0.333276	0.916723	52175	3362	48813	Myocardial infarction	FALSE	FALSE
AdrenalGland_CD163	411	-0.00636672	0.065402	0.92245	58973	10160	48813	Ischemic Heart Disease	FALSE	FALSE
AdiposeSubcutaneous_CXCL12	411	0.00725323	0.0757498	0.923717	58973	10160	48813	Ischemic Heart Disease	FALSE	FALSE
Liver_CD163	411	0.00570864	0.080563	0.94351	58973	10160	48813	Ischemic Heart Disease	FALSE	FALSE
AdiposeSubcutaneous_CXCL12	411.4	-0.00373909	0.0793743	0.962428	58035	9222	48813	Coronary atherosclerosis	FALSE	FALSE
NerveTibial_CXCL12	411	0.0031862	0.162144	0.984322	58973	10160	48813	Ischemic Heart Disease	FALSE	FALSE
CellsCulturedFibroblasts_CD163	411.4	0.00181538	0.104194	0.986099	58035	9222	48813	Coronary atherosclerosis	FALSE	FALSE

## Sheet: Table S8
Supplemental Table 8: Inflammatory GREX Associations with Atherosclerotic Phenotypes in BioVU Individuals of African Ancestry
Tissue_Gene GREX	Phenotype code	beta	SE	p	n_total	n_cases	n_controls	Phenotype description	Bonferroni significant	Nominal significant
Testis_CXCL12	411.4	-0.524234	0.179672	0.00352587	11138	810	10328	Coronary atherosclerosis	TRUE	TRUE
AdrenalGland_ABCA1	411.2	-0.634318	0.252958	0.0121553	10742	414	10328	Myocardial infarction	FALSE	TRUE
Pituitary_CXCL12	411.4	0.892998	0.358885	0.0128371	11138	810	10328	Coronary atherosclerosis	FALSE	TRUE
NerveTibial_CXCL12	411	-2.07694	0.872855	0.0173372	11330	1002	10328	Ischemic Heart Disease	FALSE	TRUE
Pituitary_CXCL12	411	0.770244	0.324669	0.0176728	11330	1002	10328	Ischemic Heart Disease	FALSE	TRUE
Testis_CXCL12	411	-0.382804	0.162566	0.0185346	11330	1002	10328	Ischemic Heart Disease	FALSE	TRUE
ArteryAorta_ABCA1	411.2	10.3077	4.39509	0.0190125	10742	414	10328	Myocardial infarction	FALSE	TRUE
Pancreas_CXCL12	411	-0.322316	0.149469	0.0310516	11330	1002	10328	Ischemic Heart Disease	FALSE	TRUE
Pituitary_CXCL12	411.2	0.988083	0.481134	0.040009	10742	414	10328	Myocardial infarction	FALSE	TRUE
HeartAtrialAppendage_CD163	411.2	-7.06432	3.71222	0.057042	10742	414	10328	Myocardial infarction	FALSE	FALSE
AdrenalGland_ABCA1	411	-0.318969	0.171263	0.0625394	11330	1002	10328	Ischemic Heart Disease	FALSE	FALSE
AdrenalGland_ABCA1	411.4	-0.350826	0.189044	0.0634834	11138	810	10328	Coronary atherosclerosis	FALSE	FALSE
Brain_Hippocampus_CXCL12	411.4	-0.688485	0.376195	0.067231	11138	810	10328	Coronary atherosclerosis	FALSE	FALSE
Brain_Hippocampus_CXCL12	411	-0.573486	0.339381	0.0910666	11330	1002	10328	Ischemic Heart Disease	FALSE	FALSE
CellsCulturedFibroblasts_ABCA1	411.4	0.884954	0.539497	0.100937	11138	810	10328	Coronary atherosclerosis	FALSE	FALSE
Liver_CD163	411.4	-0.40279	0.246775	0.102634	11138	810	10328	Coronary atherosclerosis	FALSE	FALSE
NerveTibial_CXCL12	411.4	-1.56555	0.974185	0.108046	11138	810	10328	Coronary atherosclerosis	FALSE	FALSE
CellsCulturedFibroblasts_ABCA1	411	0.778953	0.488851	0.111063	11330	1002	10328	Ischemic Heart Disease	FALSE	FALSE
Lung_CD163	411.2	1.43316	0.955237	0.133532	10742	414	10328	Myocardial infarction	FALSE	FALSE
Liver_ABCA1	411.2	0.595501	0.40173	0.138249	10742	414	10328	Myocardial infarction	FALSE	FALSE
Testis_CXCL12	411.2	-0.348162	0.235702	0.139642	10742	414	10328	Myocardial infarction	FALSE	FALSE
MinorSalivaryGland_CXCL12	411	0.292148	0.213109	0.170409	11330	1002	10328	Ischemic Heart Disease	FALSE	FALSE
ArteryAorta_CD163	411.2	-2.63657	2.01586	0.190902	10742	414	10328	Myocardial infarction	FALSE	FALSE
Pancreas_CXCL12	411.4	-0.214721	0.16472	0.192386	11138	810	10328	Coronary atherosclerosis	FALSE	FALSE
SkinNotSunExposed_CD163	411.2	-2.41096	1.85919	0.194707	10742	414	10328	Myocardial infarction	FALSE	FALSE
Testis_CD163	411.2	0.288512	0.232353	0.214349	10742	414	10328	Myocardial infarction	FALSE	FALSE
Liver_CD163	411	-0.269981	0.222868	0.225744	11330	1002	10328	Ischemic Heart Disease	FALSE	FALSE
ArteryAorta_ABCA1	411	3.70475	3.13794	0.23775	11330	1002	10328	Ischemic Heart Disease	FALSE	FALSE
BreastMammary_ABCA1	411.4	0.763992	0.702309	0.276671	11138	810	10328	Coronary atherosclerosis	FALSE	FALSE
HeartAtrialAppendage_CXCL12	411.2	-0.273615	0.254453	0.282238	10742	414	10328	Myocardial infarction	FALSE	FALSE
EsophagusMucosa_ABCA1	411.2	0.729863	0.683899	0.285877	10742	414	10328	Myocardial infarction	FALSE	FALSE
Ovary_CXCL12	411	0.226252	0.214818	0.292237	11330	1002	10328	Ischemic Heart Disease	FALSE	FALSE
ArteryTibial_ABCA1	411.4	0.28817	0.284175	0.310556	11138	810	10328	Coronary atherosclerosis	FALSE	FALSE
MinorSalivaryGland_CXCL12	411.2	0.309005	0.313116	0.323706	10742	414	10328	Myocardial infarction	FALSE	FALSE
Lung_CD163	411.4	0.669587	0.723096	0.354446	11138	810	10328	Coronary atherosclerosis	FALSE	FALSE
Pituitary_CD163	411.4	0.618192	0.66762	0.354465	11138	810	10328	Coronary atherosclerosis	FALSE	FALSE
CellsCulturedFibroblasts_ABCA1	411.2	0.625737	0.715145	0.381585	10742	414	10328	Myocardial infarction	FALSE	FALSE
Lung_CD163	411	0.570601	0.653493	0.382578	11330	1002	10328	Ischemic Heart Disease	FALSE	FALSE
WholeBlood_CD163	411.4	0.603287	0.718116	0.400854	11138	810	10328	Coronary atherosclerosis	FALSE	FALSE
SmallIntestine_CXCL12	411.4	-0.168867	0.208308	0.417562	11138	810	10328	Coronary atherosclerosis	FALSE	FALSE
ArteryAorta_ABCA1	411.4	2.80406	3.474	0.419577	11138	810	10328	Coronary atherosclerosis	FALSE	FALSE
MinorSalivaryGland_CD163	411.2	-0.613898	0.78971	0.43694	10742	414	10328	Myocardial infarction	FALSE	FALSE
Vagina_CXCL12	411.2	-0.220338	0.302759	0.466757	10742	414	10328	Myocardial infarction	FALSE	FALSE
ArteryTibial_ABCA1	411	0.183834	0.25623	0.473091	11330	1002	10328	Ischemic Heart Disease	FALSE	FALSE
SmallIntestine_CXCL12	411	-0.134967	0.189095	0.47538	11330	1002	10328	Ischemic Heart Disease	FALSE	FALSE
NerveTibial_CD163	411.2	-0.835893	1.19195	0.483126	10742	414	10328	Myocardial infarction	FALSE	FALSE
Pancreas_CXCL12	411.2	-0.150666	0.215721	0.484907	10742	414	10328	Myocardial infarction	FALSE	FALSE
EsophagusMucosa_ABCA1	411.4	-0.352862	0.520243	0.497604	11138	810	10328	Coronary atherosclerosis	FALSE	FALSE
NerveTibial_CXCL12	411.2	-0.910621	1.34592	0.498672	10742	414	10328	Myocardial infarction	FALSE	FALSE
Liver_CD163	411.2	0.210971	0.321511	0.511704	10742	414	10328	Myocardial infarction	FALSE	FALSE
Pituitary_CD163	411	0.39939	0.613085	0.51476	11330	1002	10328	Ischemic Heart Disease	FALSE	FALSE
HeartAtrialAppendage_CXCL12	411.4	-0.122156	0.192483	0.52567	11138	810	10328	Coronary atherosclerosis	FALSE	FALSE
HeartAtrialAppendage_CD163	411	-1.68139	2.73957	0.539385	11330	1002	10328	Ischemic Heart Disease	FALSE	FALSE
ArteryAorta_CD163	411.4	1.00709	1.64519	0.540444	11138	810	10328	Coronary atherosclerosis	FALSE	FALSE
MuscleSkeletal_ABCA1	411.2	-0.262904	0.431984	0.542791	10742	414	10328	Myocardial infarction	FALSE	FALSE
SkinNotSunExposed_CD163	411.4	0.918129	1.51533	0.544586	11138	810	10328	Coronary atherosclerosis	FALSE	FALSE
BreastMammary_ABCA1	411	0.381779	0.634204	0.547187	11330	1002	10328	Ischemic Heart Disease	FALSE	FALSE
Testis_CD163	411	0.0934071	0.159801	0.558869	11330	1002	10328	Ischemic Heart Disease	FALSE	FALSE
HeartAtrialAppendage_CD163	411.4	1.83641	3.16351	0.56158	11138	810	10328	Coronary atherosclerosis	FALSE	FALSE
EsophagusMuscularis_ABCA1	411	-0.696172	1.23273	0.572249	11330	1002	10328	Ischemic Heart Disease	FALSE	FALSE
Brain_Hippocampus_CXCL12	411.2	-0.272312	0.493896	0.58139	10742	414	10328	Myocardial infarction	FALSE	FALSE
AdrenalGland_CD163	411.2	0.15359	0.286166	0.591464	10742	414	10328	Myocardial infarction	FALSE	FALSE
NerveTibial_CD163	411.4	0.490766	0.93436	0.599415	11138	810	10328	Coronary atherosclerosis	FALSE	FALSE
Vagina_CXCL12	411	-0.103402	0.204041	0.612317	11330	1002	10328	Ischemic Heart Disease	FALSE	FALSE
ArteryTibial_ABCA1	411.2	-0.185901	0.3689	0.614308	10742	414	10328	Myocardial infarction	FALSE	FALSE
BreastMammary_ABCA1	411.2	0.482694	0.96118	0.615535	10742	414	10328	Myocardial infarction	FALSE	FALSE
EsophagusMuscularis_ABCA1	411.2	-0.894701	1.81222	0.621515	10742	414	10328	Myocardial infarction	FALSE	FALSE
Liver_ABCA1	411	-0.13113	0.267417	0.623881	11330	1002	10328	Ischemic Heart Disease	FALSE	FALSE
Vagina_CXCL12	411.4	-0.106837	0.225138	0.635114	11138	810	10328	Coronary atherosclerosis	FALSE	FALSE
SkinSunExposed_ABCA1	411.4	0.602852	1.31158	0.645777	11138	810	10328	Coronary atherosclerosis	FALSE	FALSE
Pancreas_CD163	411.2	0.165081	0.365888	0.651861	10742	414	10328	Myocardial infarction	FALSE	FALSE
Pituitary_CD163	411.2	0.384551	0.879606	0.661977	10742	414	10328	Myocardial infarction	FALSE	FALSE
MuscleSkeletal_ABCA1	411.4	0.133655	0.316556	0.672867	11138	810	10328	Coronary atherosclerosis	FALSE	FALSE
EsophagusMucosa_ABCA1	411	-0.188394	0.472042	0.689817	11330	1002	10328	Ischemic Heart Disease	FALSE	FALSE
Brain_Cerebellum_CXCL12	411	-0.232177	0.6023	0.699879	11330	1002	10328	Ischemic Heart Disease	FALSE	FALSE
Brain_Cerebellum_CXCL12	411.4	-0.252347	0.664506	0.70413	11138	810	10328	Coronary atherosclerosis	FALSE	FALSE
MinorSalivaryGland_CD163	411	-0.195862	0.535723	0.714661	11330	1002	10328	Ischemic Heart Disease	FALSE	FALSE
AdiposeSubcutaneous_CXCL12	411	0.0633675	0.173533	0.714991	11330	1002	10328	Ischemic Heart Disease	FALSE	FALSE
Ovary_CXCL12	411.2	0.111417	0.311232	0.720353	10742	414	10328	Myocardial infarction	FALSE	FALSE
WholeBlood_CD163	411.2	-0.332977	0.963222	0.729575	10742	414	10328	Myocardial infarction	FALSE	FALSE
HeartLeftVentricle_ABCA1	411.4	0.686584	2.06255	0.739224	11138	810	10328	Coronary atherosclerosis	FALSE	FALSE
AdrenalGland_CD163	411	-0.063748	0.197635	0.747032	11330	1002	10328	Ischemic Heart Disease	FALSE	FALSE
MinorSalivaryGland_CXCL12	411.4	0.0742128	0.234104	0.751237	11138	810	10328	Coronary atherosclerosis	FALSE	FALSE
Ovary_CXCL12	411.4	0.0676265	0.23542	0.773914	11138	810	10328	Coronary atherosclerosis	FALSE	FALSE
ArteryAorta_CD163	411	-0.410921	1.44715	0.776447	11330	1002	10328	Ischemic Heart Disease	FALSE	FALSE
SkinNotSunExposed_CD163	411	-0.366156	1.33394	0.783706	11330	1002	10328	Ischemic Heart Disease	FALSE	FALSE
HeartLeftVentricle_ABCA1	411.2	-0.741839	2.7322	0.785993	10742	414	10328	Myocardial infarction	FALSE	FALSE
Pancreas_CD163	411.4	0.075082	0.278992	0.787838	11138	810	10328	Coronary atherosclerosis	FALSE	FALSE
MuscleSkeletal_ABCA1	411	0.0752618	0.287265	0.793326	11330	1002	10328	Ischemic Heart Disease	FALSE	FALSE
CellsCulturedFibroblasts_CD163	411.4	0.0770672	0.321364	0.810476	11138	810	10328	Coronary atherosclerosis	FALSE	FALSE
HeartAtrialAppendage_CXCL12	411	-0.0383723	0.173123	0.824589	11330	1002	10328	Ischemic Heart Disease	FALSE	FALSE
AdiposeSubcutaneous_CXCL12	411.4	-0.0401175	0.191509	0.834073	11138	810	10328	Coronary atherosclerosis	FALSE	FALSE
AdrenalGland_CD163	411.4	0.03858	0.217938	0.859491	11138	810	10328	Coronary atherosclerosis	FALSE	FALSE
SkinSunExposed_ABCA1	411.2	-0.296376	1.73526	0.864384	10742	414	10328	Myocardial infarction	FALSE	FALSE
MinorSalivaryGland_CD163	411.4	0.0968406	0.586503	0.868853	11138	810	10328	Coronary atherosclerosis	FALSE	FALSE
HeartLeftVentricle_ABCA1	411	-0.302501	1.87572	0.871879	11330	1002	10328	Ischemic Heart Disease	FALSE	FALSE
WholeBlood_CD163	411	-0.0928217	0.655192	0.88734	11330	1002	10328	Ischemic Heart Disease	FALSE	FALSE
Pancreas_CD163	411	0.0333852	0.251868	0.894549	11330	1002	10328	Ischemic Heart Disease	FALSE	FALSE
SmallIntestine_CXCL12	411.2	-0.034521	0.271084	0.898668	10742	414	10328	Myocardial infarction	FALSE	FALSE
Testis_CD163	411.4	-0.0208798	0.175614	0.905358	11138	810	10328	Coronary atherosclerosis	FALSE	FALSE
AdiposeSubcutaneous_CXCL12	411.2	-0.0285686	0.251127	0.909427	10742	414	10328	Myocardial infarction	FALSE	FALSE
SkinSunExposed_ABCA1	411	-0.110185	1.19294	0.926408	11330	1002	10328	Ischemic Heart Disease	FALSE	FALSE
EsophagusMuscularis_ABCA1	411.4	-0.0994113	1.35962	0.941713	11138	810	10328	Coronary atherosclerosis	FALSE	FALSE
Liver_ABCA1	411.4	-0.021106	0.296598	0.94327	11138	810	10328	Coronary atherosclerosis	FALSE	FALSE
CellsCulturedFibroblasts_CD163	411	0.019803	0.290458	0.945643	11330	1002	10328	Ischemic Heart Disease	FALSE	FALSE
CellsCulturedFibroblasts_CD163	411.2	-0.0271159	0.41763	0.948231	10742	414	10328	Myocardial infarction	FALSE	FALSE
NerveTibial_CD163	411	-0.0177015	0.834863	0.983084	11330	1002	10328	Ischemic Heart Disease	FALSE	FALSE
Brain_Cerebellum_CXCL12	411.2	-0.0164016	0.873393	0.985017	10742	414	10328	Myocardial infarction	FALSE	FALSE

## Sheet: Table S9
Supplemental Table 9: Sensitivity Analyses for HIV diagnosis in BioVU Cohort
				Before HIV conditioning								After HIV conditioning
BioVU Cohort	Tissue_Gene GREX	Phenotype code	Phenotype description	n_total	n_cases	n_controls	beta	SE	p	Bonferroni significant	Nominal significant	n_total	n_cases	n_controls	beta	SE	p	Bonferroni significant	Nominal significant
European ancestry	Brain_Hippocampus_CXCL12	411.4	Coronary atherosclerosis	58035	9222	48813	-0.247573	0.0809912	0.00223725	TRUE	TRUE	44450	7925	36525	-0.197505	0.0898925	0.0280115	FALSE	TRUE
African ancestry	Testis_CXCL12	411.4	Coronary atherosclerosis	11138	810	10328	-0.524234	0.179672	0.00352587	TRUE	TRUE	8751	709	8042	-0.431721	0.19647	0.0279929	FALSE	TRUE
